# Supplementary material for: Identification of Key Residues in Dengue Virus NS1 Protein That Are Essential for Its Secretion
Source: MDPI journal article supplement (doi:10.3390/v15051102), 2023-04-30
Supplement: s1 [file s1]

Supplementary Table S2. Oligonucleotide sequences (5' to 3')

|                     |                                                           |
|---------------------|-----------------------------------------------------------|
| <i>MluI</i> ext FWD | TTTGTGGAATCCGCTCAGTAACGCGTCT                              |
| <i>KasI</i> ext REV | CCTATGTCATCCGTCATAGTGGCGCCTACCATAACC                      |
| NS1 N130A FWD       | GCTCTCTACAGAGTCTCAT <u>G</u> CCAGACCTTTCTCATTGATGGCCC     |
| NS1 N130A REV       | CCATCAATGAGAAAGGTCTGGG <u>C</u> ATGAGACTCTGTAGAGAGCAT     |
| NS1 N207A FWD       | TGGATAGAAAGTGCACCTC <u>G</u> CTGACACATGGAAGATAGAGAAAGCCTC |
| NS1 N207A REV       | TCTCTATCTTCCATGTGTCA <u>G</u> CGAGTGCACCTTTCTATCCAATAACC  |
| NS1 V220D FWD       | AAAGCCTCTTTCATTGAAG <u>A</u> TAAAAACTGCCACTGGCCAA         |
| NS1 V220D REV       | TGGCCAGTGGCAGTTTTTA <u>T</u> CTTCAATGAAAGAGGCTTTCT        |
| NS1 A248V FWD       | ATAATTCCAAAGAATCTCG <u>T</u> TGGACCAGTGTCTCAACACAATA      |
| NS1 A248V REV       | GTGTTGAGACACTGGTCCA <u>A</u> CGAGATTCTTTGGAATTATCATCT     |
| pLenti6 NS1 FWD     | TAGAAGACACCGACTCTAGACCACCAT <u>G</u> AGCACCTCACTGTCTGTG   |
| pLenti6 NS1 REV     | GCCAGCCGCTCACTGATCCCC <u>A</u> GCTGTGACCAAGGAGT <u>G</u>  |
| HiBiT TOP FWD       | CTCGAGGGATCAGTGAGCGGCTGGCGGCTGTTCAAGAAGATTAGCTAGA         |
| HiBiT BOT REV       | CGCGTCTAGCTAATCTTCTTGAACAGCCGCCAGCCGCTCACTGATCCC          |
