# Supplementary material for: Identification of Key Residues in Dengue Virus NS1 Protein That Are Essential for Its Secretion
Source: MDPI journal article supplement (doi:10.3390/v15051102), 2023-04-30
Supplement: s1 [file s1]

Supplementary Table S1. Antibodies and Dyes

| Reagent    | Manufacturer/ source                 |                                             | Identifier   |
|------------|--------------------------------------|---------------------------------------------|--------------|
| Antibodies | Mouse anti-NS1 '4G4'                 | Mozzy Mabs                                  | MMABS 4G4*   |
|            | DENV NS3 (GT2811)                    | GeneTex                                     | GTX629477    |
|            | DENV NS4B                            | GeneTex                                     | GTX12450     |
|            | Mouse anti-capsid '6F3.1'            | Prof. John Aaskov (QUT,Brisbane, Australia) | N/A          |
|            | Mouse anti-HiBiT (Clone 30E5)        | Promega                                     | Early Access |
|            | Monoclonal mouse anti $\beta$ -actin | Sigma Aldrich                               | A5441        |
|            | IR®Dye 800CW goat-anti mouse         | LI-COR                                      | 926-32210    |
|            | Alexa Fluor 488 goat-anti mouse      | Thermo Fisher Scientific                    | A11001       |
|            | Alexa Fluor 488 goat anti-rabbit     | Thermo Fisher Scientific                    | A11008       |
|            | Alexa Fluor 555 goat anti-mouse      | Thermo Fisher Scientific                    | A21422       |
| Dyes       | DAPI                                 | Sigma Aldrich                               | D9542-5MG    |
|            | IraZolve-ER Blue®                    | REZOLVE Scientific, Australia               | 1101026      |

\*Anti-NS1 mAb 4G4 was raised against immunopurified NS1 prepared from MVEV-infected cells [52]. The exact epitope that is recognised is unknown.
